# Supplementary material for: Synthesis, Characterization, and Electropolymerization of Extended Fused-Ring Thieno[3,4-b]pyrazine-Based Terthienyls
Source: MDPI journal article supplement (doi:10.3390/ma9060404), 2016-05-26
Supplement: s1 [file s1]

# Supplementary Materials: Synthesis, Characterization, and Electropolymerization of Extended Fused-Ring Thieno[3,4-*b*]pyrazine-Based Terthienyls

Kristine L. Konkol, Ryan L. Schwiderski and Seth C. Rasmussen

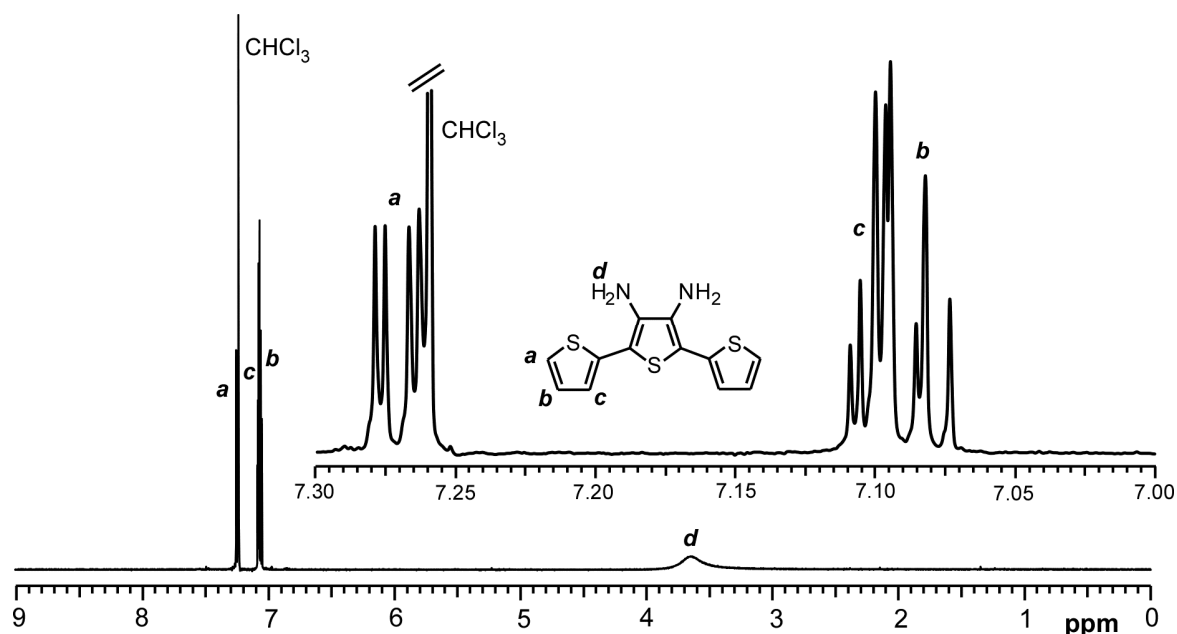

Figure S1.  $^1\text{H}$  NMR Spectrum of Compound 10.

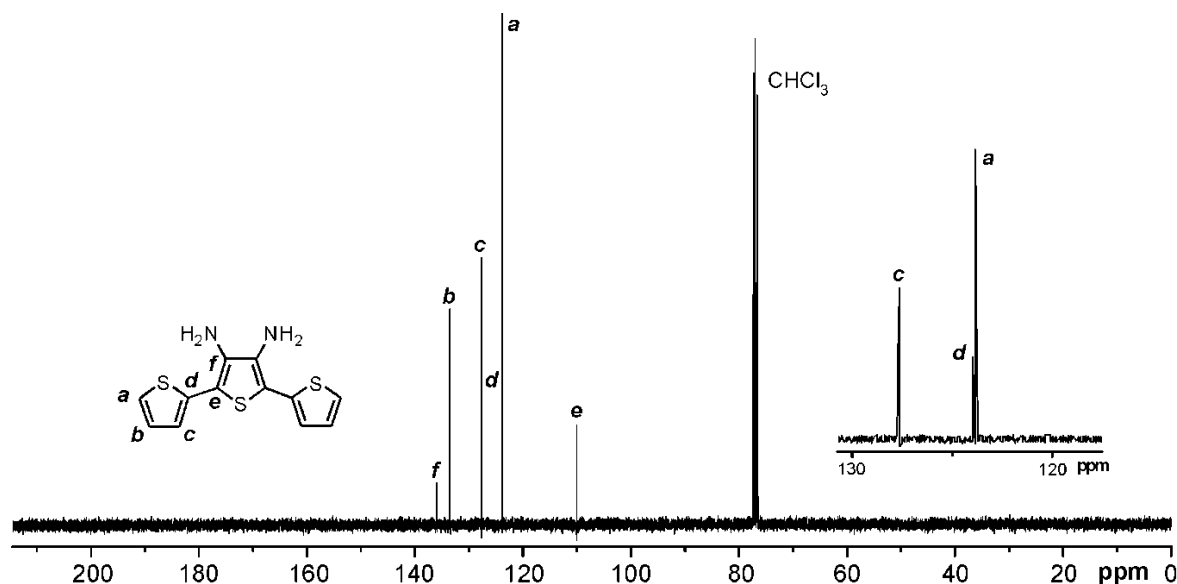

Figure S2.  $^{13}\text{C}$  NMR Spectrum of Compound 10.

**Modeling of 2nd order coupling effects in Compound 10.** To verify the assignment of peaks near 7.1 ppm in the  $^1\text{H}$  NMR spectrum of compound 10 as two strongly coupled doublet-of-doubles, the experimentally determined coupling constants and chemical shifts were used to simulate the NMR spectrum. This was accomplished using a freely available NMR simulator [1] which could accurately model the 2nd order effects inherent from the close spacing of the coupled multiplets [2]. The values used for the modeling are as follows:

Spin system: ABC

delta 1 (ppm): 7.1018

delta 2 (ppm): 7.0848      J1-2 (Hz): 3.65

delta 3 (ppm): 7.2714      J1-3 (Hz): 1.44      J2-3 (Hz): 4.84

From: 7.0 to 7.3 ppm

Field strength: 400 MHz

Line width: 0.5 Hz

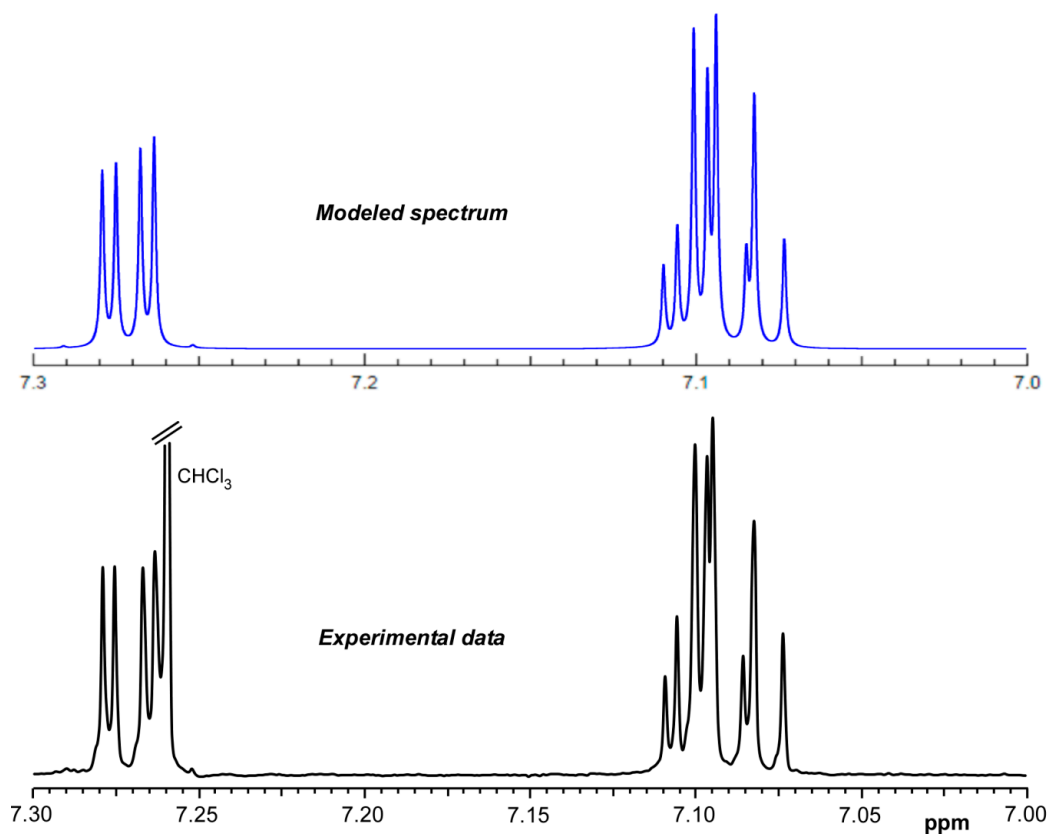

**Figure S3.** Comparison of results from modeling of 2nd order coupling effects in the <sup>1</sup>H NMR spectrum of **10**.

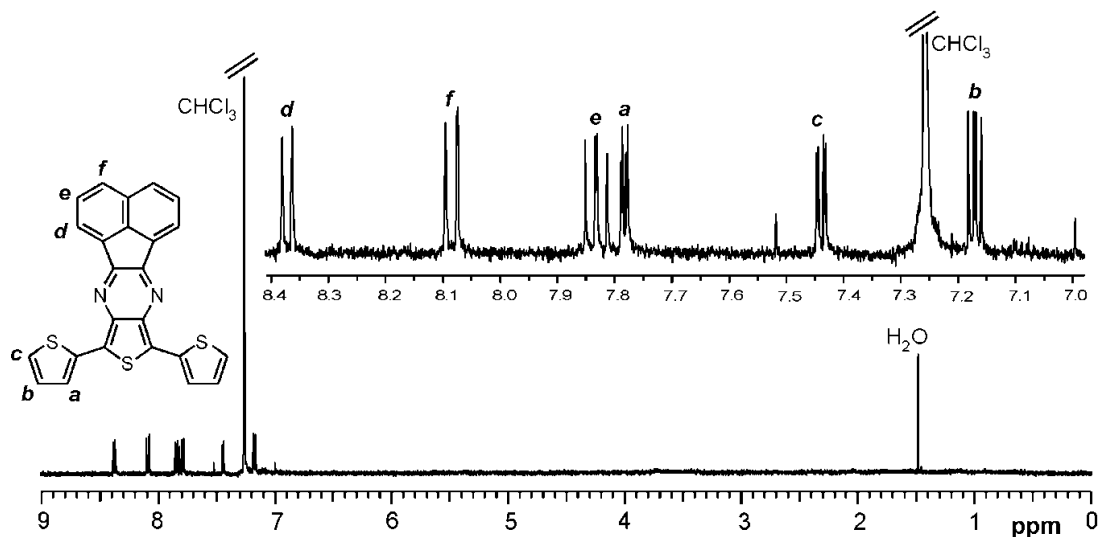

**Figure S4.** <sup>1</sup>H NMR Spectrum of Compound T3.

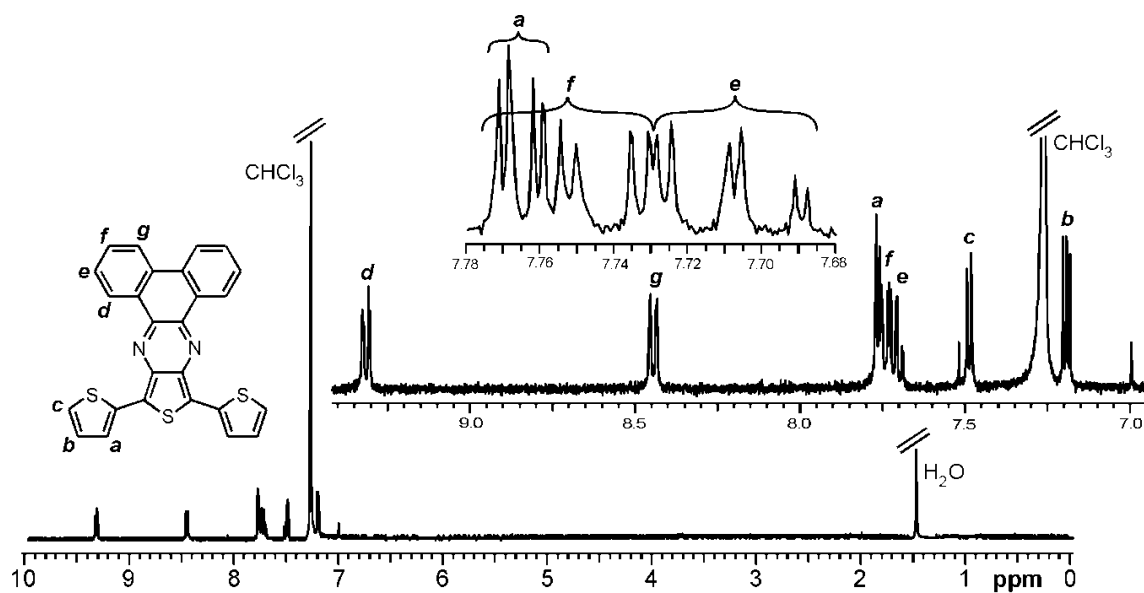Figure S5.  $^1\text{H}$  NMR Spectrum of Compound T4.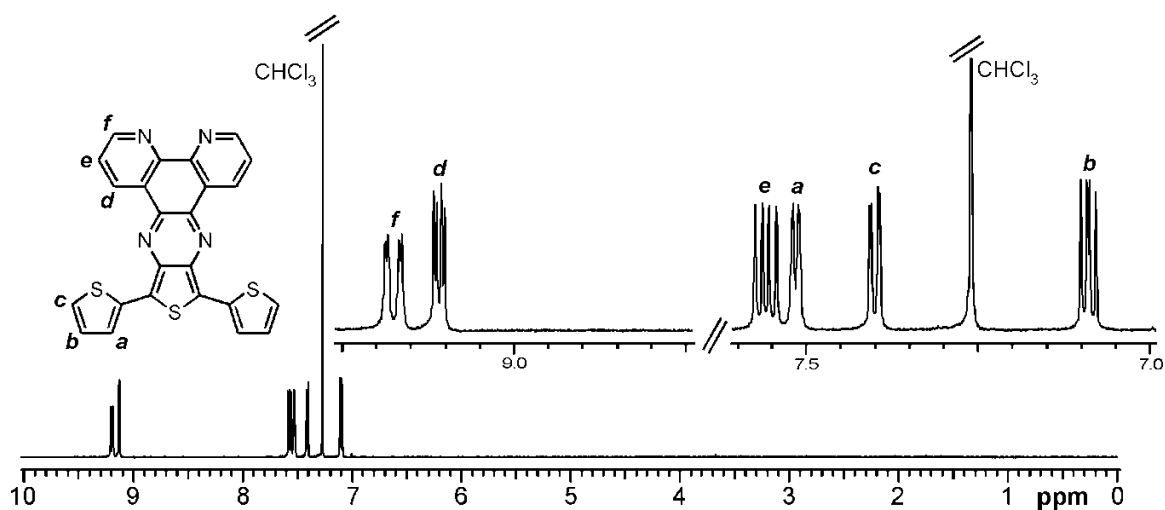Figure S6.  $^1\text{H}$  NMR Spectrum of Compound T5.

## References

1. Institute of Chemical Sciences and Engineering. Tools for NMR Spectroscopists. Available online: <http://www.nmrdb.org/simulator/index.shtml?v=v2.34.1> (accessed on 22 April 2016).
2. Castillo, A.M.; Patiny, L.; Wist, J. Fast and accurate algorithm for the simulation of NMR for large spin systems. *J. Mag. Res.* **2011**, *209*, 123–130.
